# Supplementary material for: Antibiotic-Induced Treatments Reveal Stress-Responsive Gene Expression in the Endangered Lichen Lobaria pulmonaria
Source: MDPI journal article supplement (doi:10.3390/jof8060625), 2022-06-12
Supplement: s1 [file s1]

## Supplementary Information for

Antibiotic-induced treatments reveal stress-responsive gene expression in the endangered lichen  
*Lobaria pulmonaria*

Tania Chavarria-Pizarro<sup>1\*</sup>, Philipp Resl<sup>1,2</sup>, Theresa Kuhl<sup>3</sup>, Aleksandar Janjic<sup>4</sup>, Fernando Fernandez Mendoza<sup>2</sup> and Silke Werth<sup>1</sup>

1. Systematics, Diversity and Evolution of Plants, Faculty of Biology, LMU Munich, Menzingerstraße 67, 80638 Munich, Germany

2. Institute of Biology, University of Graz, Austria

3. Institute for Network Biology (INET). Helmholtz Center Munich, Neuherberg, Germany

4. Anthropology and Human Genomics, Faculty of Biology, LMU Munich, Großhaderner Straße 2-4, 82152 Planegg-Martinsried, Germany

\*to whom correspondence should be sent: [t.chavarria@lmu.de](mailto:t.chavarria@lmu.de)

This file includes:

Figs. S1-S12

Tables S1-S6

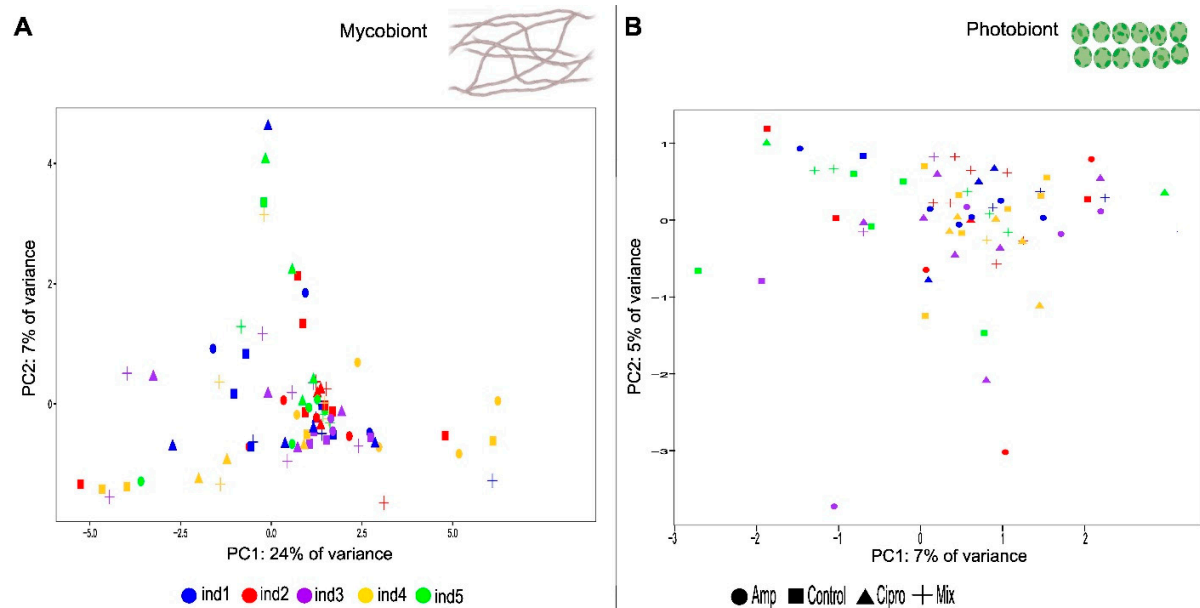

Figure S1. Principal component analysis of gene expression count data for *L. pulmonaria* included in the antibiotic experiment (see Figure 1). Color-coding represents the different individual thalli used in the experiment: blue (ind1), red (ind2), purple (ind3), yellow (ind4), green (ind5). Symbols represent the different treatments: circle (Ampicillin, Amp), square (Control), cross (Ampicillin + Ciprofloxacin, Mix), triangle (Ciprofloxacin, Cipro). A) Mycobiont B) Photobiont. (n = 96 samples).

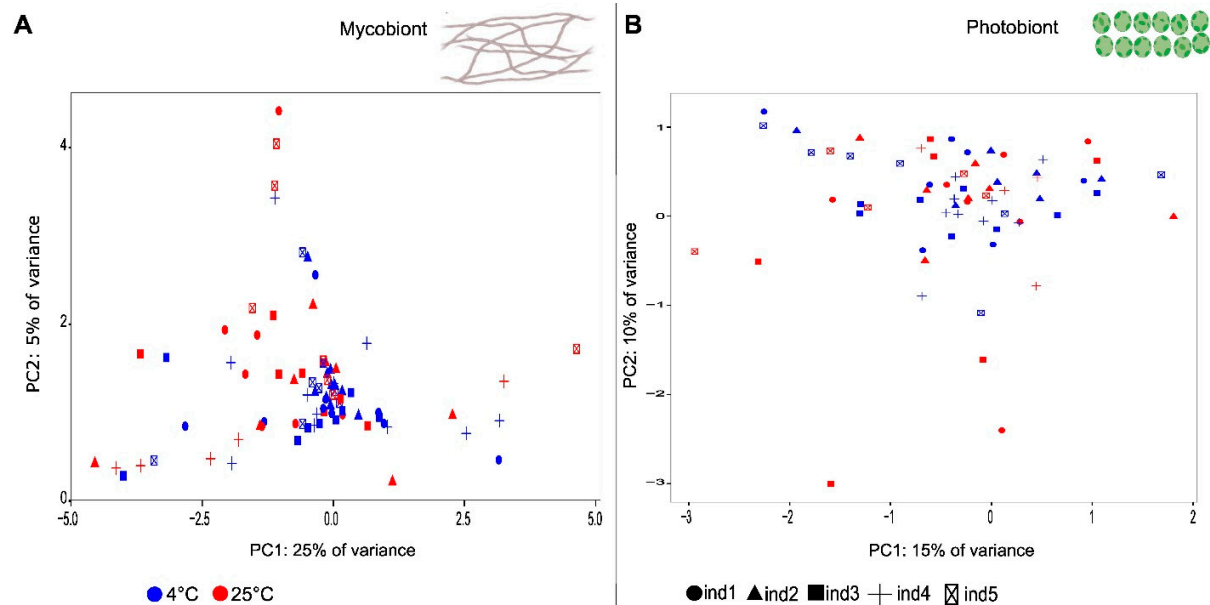

Figure S2. Principal component analysis of gene expression count data for *L. pulmonaria* included in the antibiotic experiment (see Figure 1). Color-coding represents the temperatures

that the samples were exposed to: red (High temperature, 25 °C), and blue (Low temperature, 4 °C). Symbols represent the different individual thalli: circle (ind1), triangle (ind2), square (ind3), cross (ind4), square with equis (ind5). A) Mycobiont B) Photobiont. (n = 96 samples).

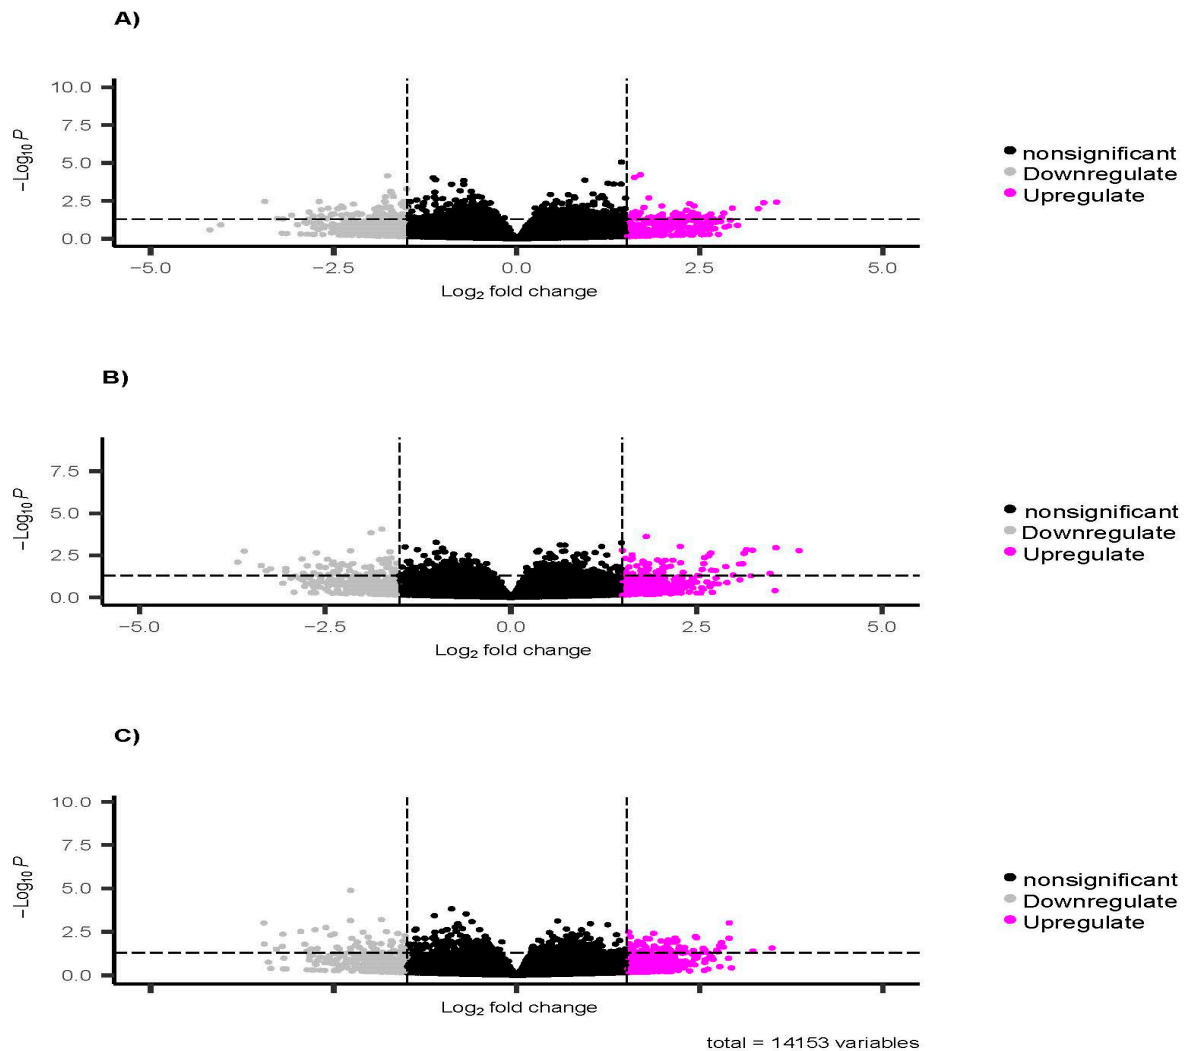

Figure S3. Enhanced volcano plot showing log 2-fold changes and negative log 10 of the probability of differential gene expression in the *L. pulmonaria* mycobiont between treatments A) Control vs. Ampicillin (Amp) B) Control vs. Ciprofloxacin (Cipro) C) Control vs. Mix (Cipro + Amp). Upregulated genes are in magenta color and downregulated are in grey color. A Benjamini–Hochberg adjusted p-value  $p < 0.0001$  was used as a threshold for consideration as DE gene (are above the dashed line); additionally, only transcripts with  $> 1.5$  log2-fold change were considered upregulated and  $< -1.5$  log2-fold change were considered downregulated.

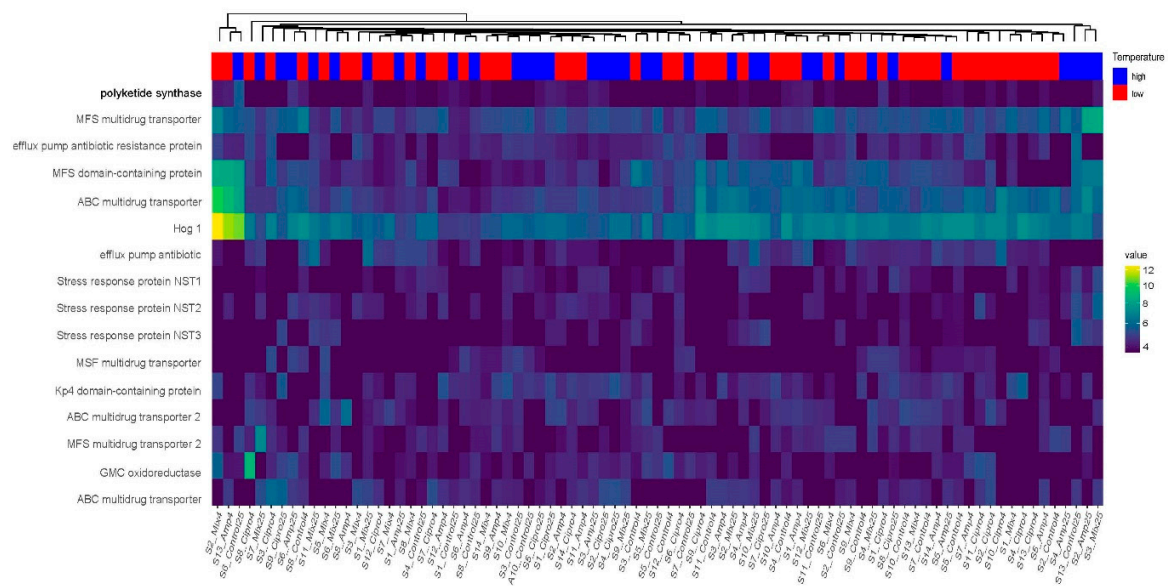

Figure S4. Heatmap showing differentially expressed genes encoding stress-related genes in the mycobiont of the lichen *L. pulmonaria* at different temperatures: 4 °C (blue), and 25 °C (red). We created the heatmap with the vst-normalized counts and then computed a distance matrix based on the differential expression.

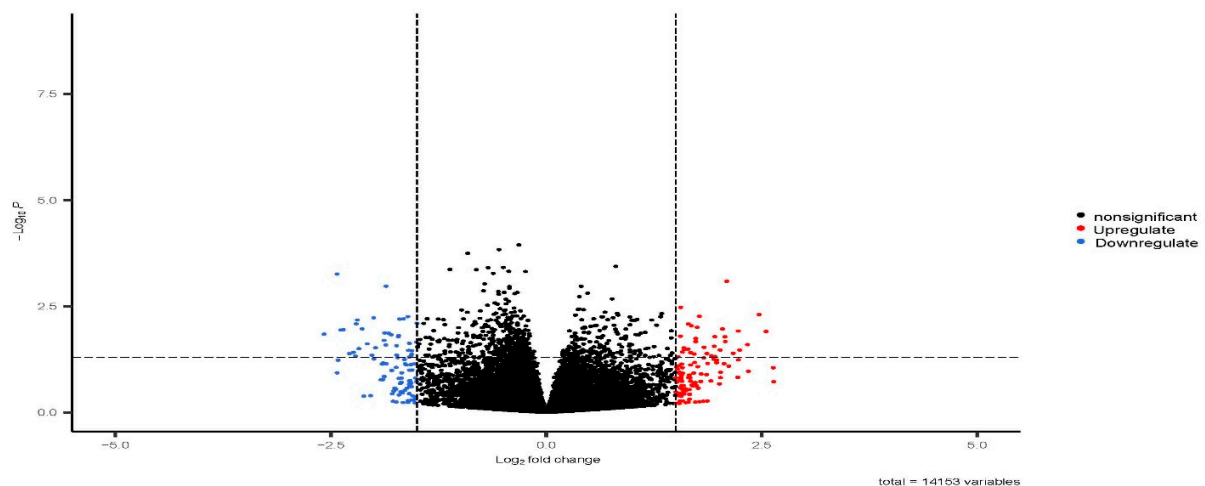

Figure S5. Enhanced volcano plot showing differential gene expression in the mycobiont of *L. pulmonaria* between high temperatures (25 °C) and low temperatures (4 °C). Upregulated genes are in red color and downregulated are in blue color. A Benjamini–Hochberg adjusted p-value  $p < 0.05$  was used as a threshold for consideration as DE gene (above the dashed line), additionally only transcripts with  $> 1.5$  log<sub>2</sub>-fold change were considered upregulated and  $< -1.5$  log<sub>2</sub>-fold change were considered downregulated.

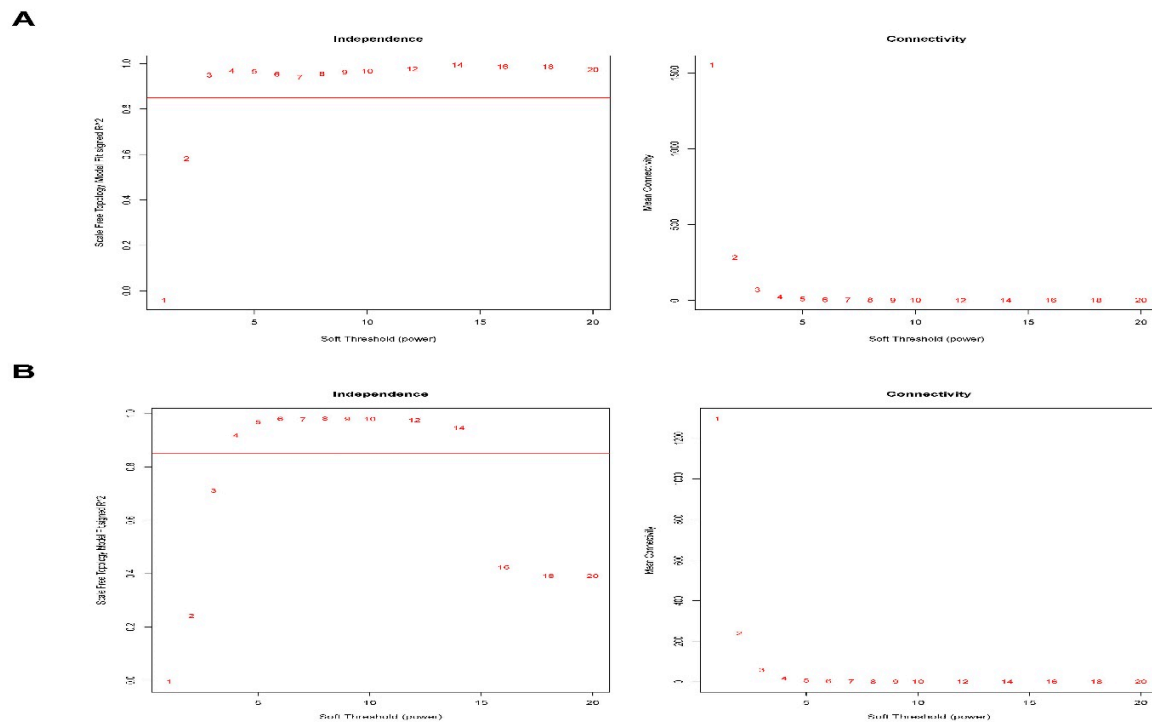

Figure S6. Analysis of network topology for selected soft-thresholding powers. The scale-free fit index as a function of the soft-thresholding power is on the left, and the mean connectivity of the soft-thresholding power is on the right. A) We selected the power 3 for the mycobiont expression set which is the lowest value above 0.85 for which the scale-free topology fits the index curve plateaus until it reaches a high value. B) We selected the power 4 for the photobiont expression set, which is the lowest value above 0.80 for which the scale-free topology fits the index curve plateaus until it reaches a high value.

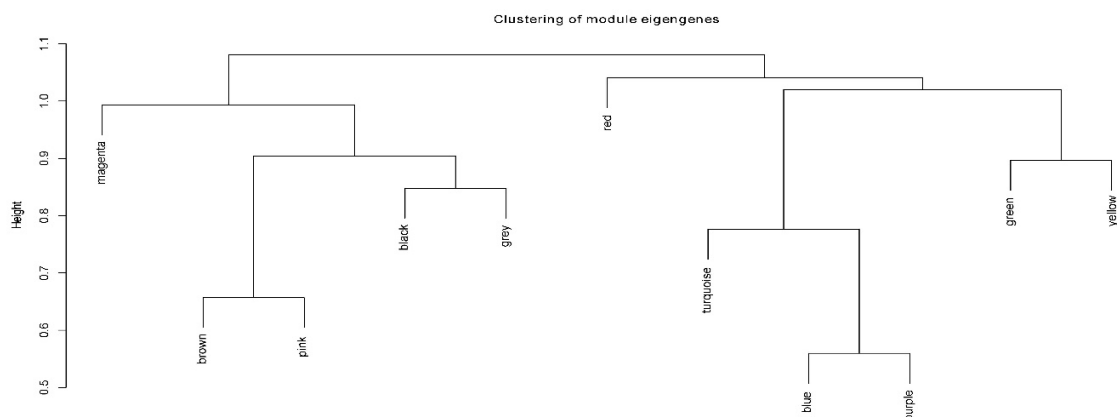

Figure S7. Hierarchical clustering dendrogram of module eigengenes in the *L. pulmonaria* mycobiont (shown is the first principal component of a module, representative of the overall expression profile for genes within that module).

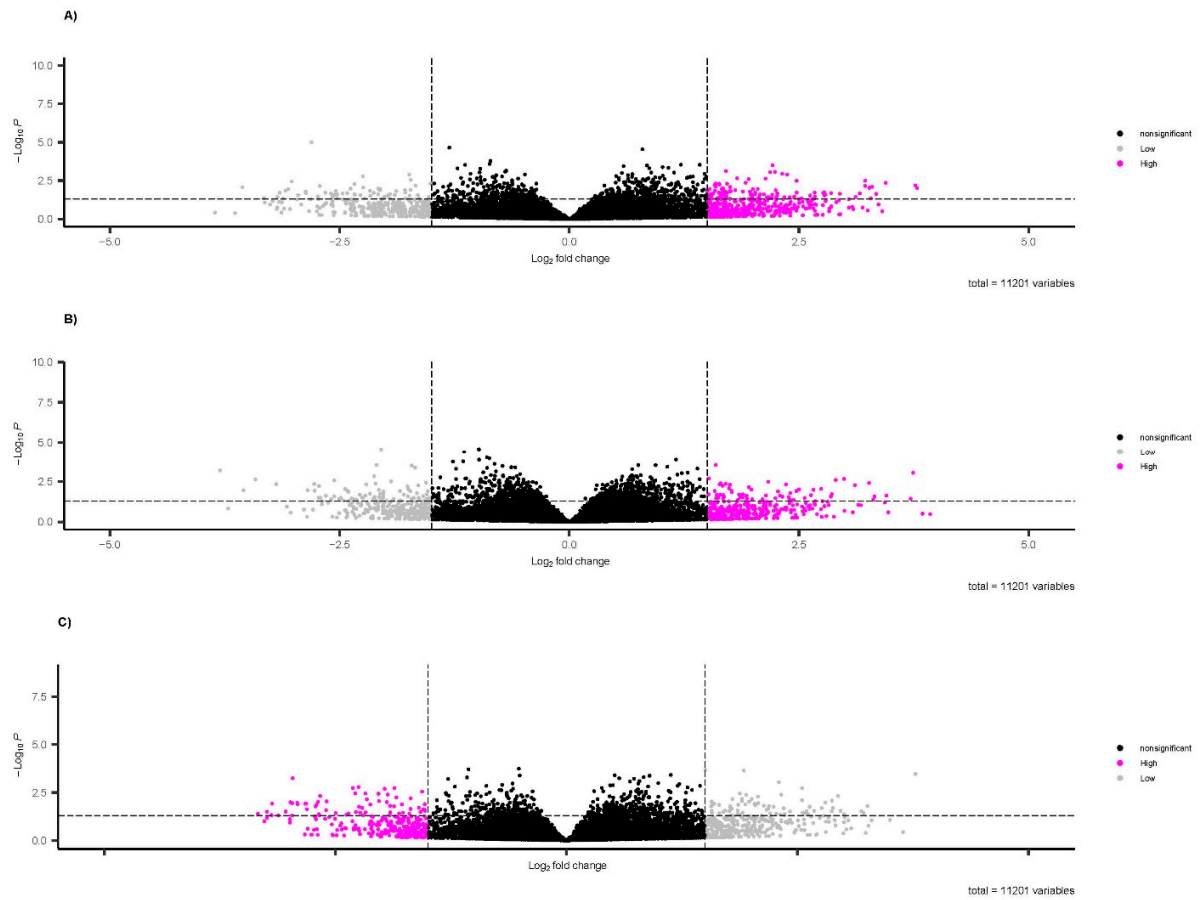

Figure S8. Enhanced volcano plot showing  $\log_2$ -fold changes and negative  $\log_{10}$  of the probability of differential gene expression in the photobiont *S. reticulata* between treatments A) Control vs. Ampicillin (Amp) B) Control vs. Ciprofloxacin (Cipro) C) Control vs. Mix (Cipro + Amp). Upregulated genes are in magenta color and downregulated are in grey color. A Benjamini–Hochberg adjusted p-value  $p < 0.0001$  was used as a threshold for consideration as DE gene (are above the dashed line); additionally, only transcripts with  $> 1.5 \log_2$ -fold change were considered upregulated and  $< -1.5 \log_2$ -fold change were considered downregulated.

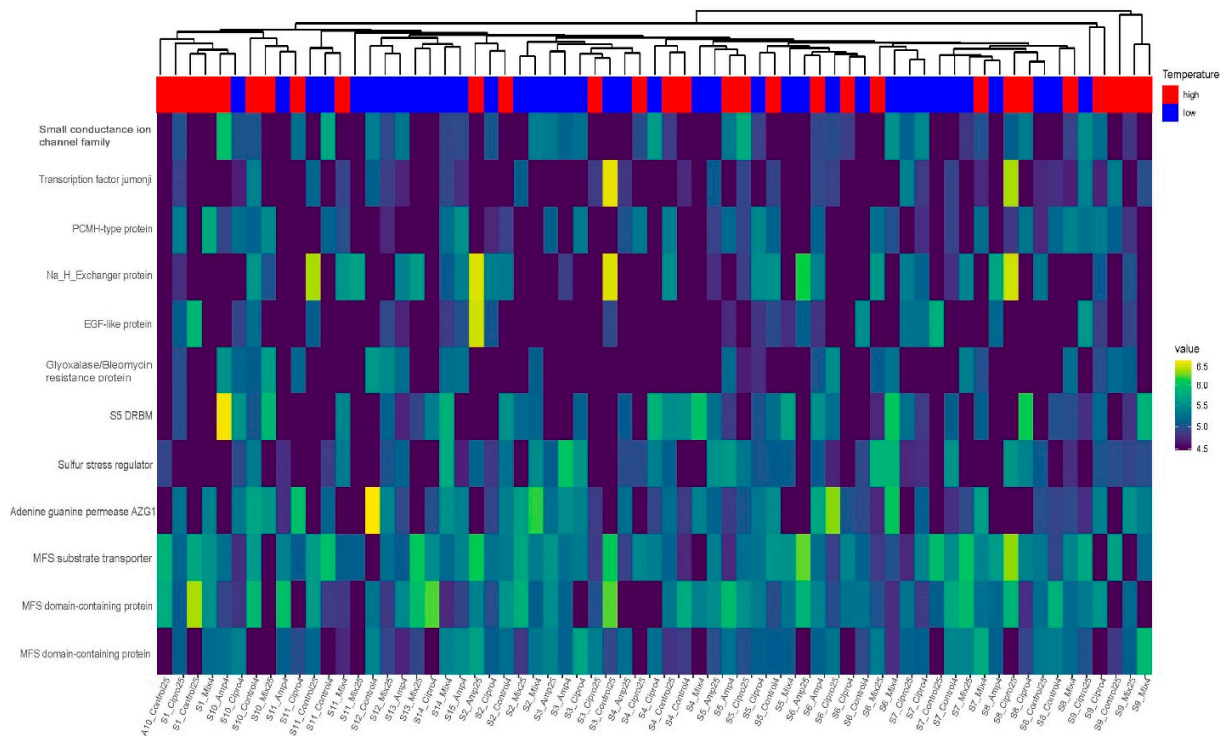

Figure S9. Heatmap showing differentially expressed stress response genes in *S. reticulata*, the green-algal photobiont of *L. pulmonaria*, at different temperatures: 4 C°(blue), 15 C°(yellow), and 25 C°(red). We created the heatmap with vst-normalized counts and then by computing a distance matrix based on the differential expression.

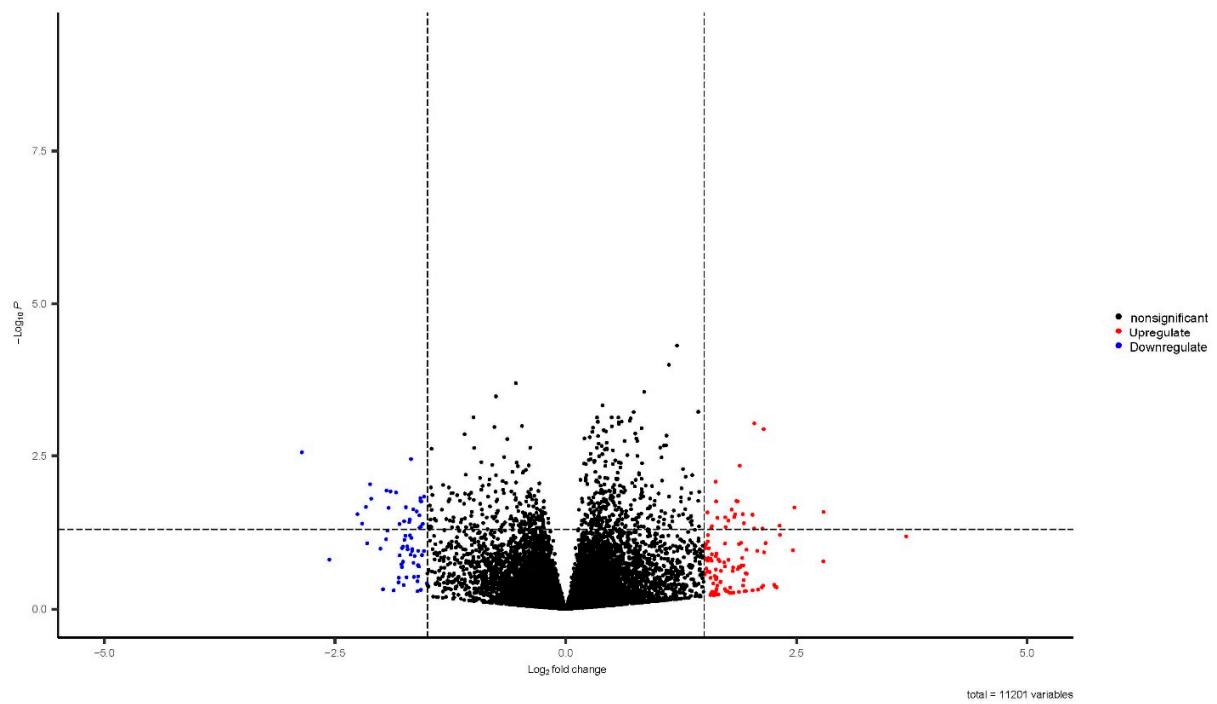

Figure S10. Enhanced volcano plot showing differential gene expression in the photobiont *S. reticulata* between high temperatures (25 °C) and low temperatures (4 °C). Upregulated genes are in red color and downregulated are in blue color. A Benjamini–Hochberg adjusted p-value  $p < 0.05$  was used as a threshold for consideration as DE gene (above the dashed line); additionally, only transcripts with  $> 1.5$  log<sub>2</sub>-fold change were considered upregulated and  $< -1.5$  log<sub>2</sub>-fold change were considered downregulated.



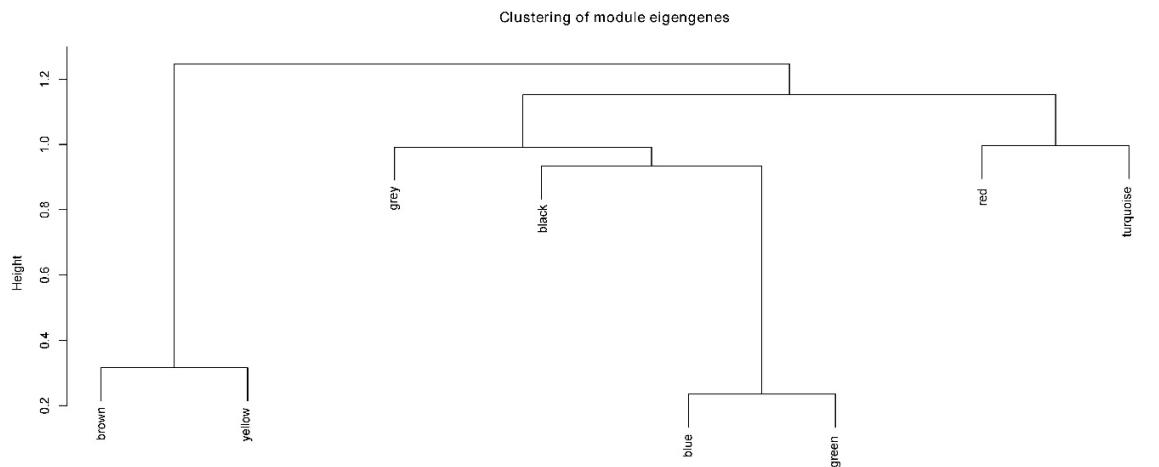

Figure S11. Hierarchical clustering dendrogram of module eigengenes in *S. reticulata*, the green-algal photobiont of *L. pulmonaria* (shown is the first principal component of a module, representative of the overall expression profile for genes within that module).

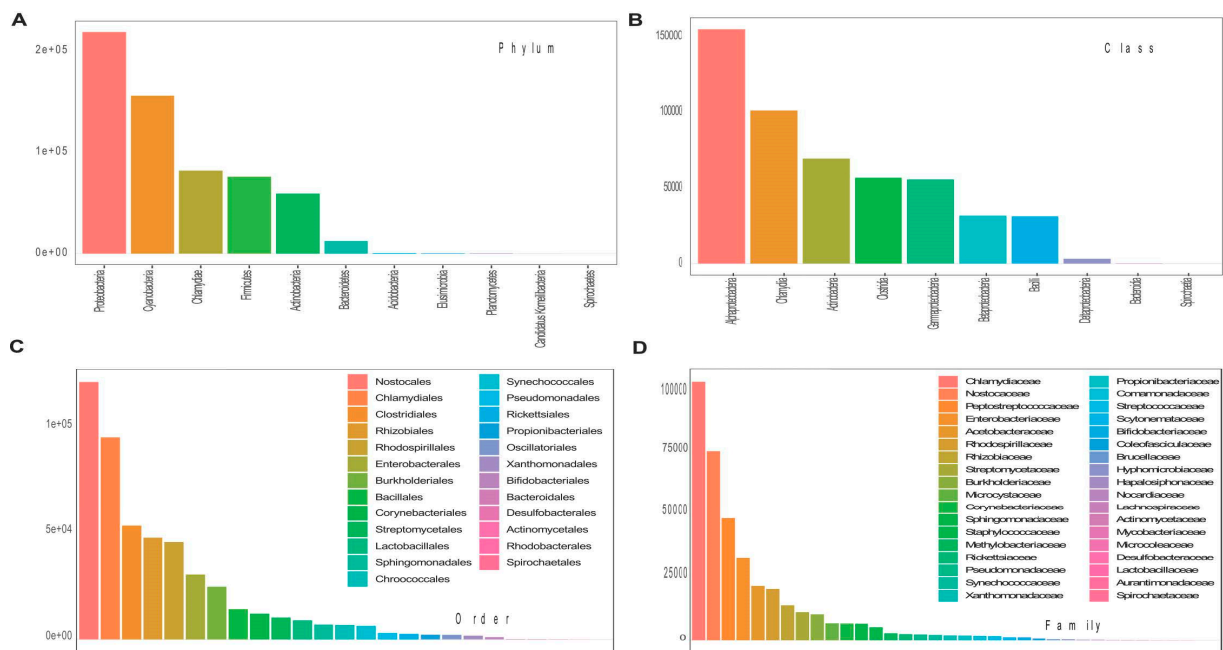

Figure S12. Relative abundance of microbiome in the lichen *L. pulmonaria*. A) Abundance of bacteria at the phylum level. B) Abundance of bacteria at class level. C) Abundance of bacteria at order level. D) Abundance of bacteria at family level.

Table S1. Differential expression genes in the mycobiont of *L. pulmonaria*. The analysis used pairwise comparisons between samples not treated with Antibiotic (Control), and treated with Antibiotic: Ampicillin (Amp), Ciprofloxacin (Cipro) and Mix. As threshold values, a log2-fold change >1.5 and Benjamini–Hochberg adjusted p-value <0.05 were used. Genes were identified according to the *L. pulmonaria* genome (JGI) and their function according to the fungi genome database at Uniprot. \* target responsive genes.

| Down/Up Regulated      | Transcript                                                         | Log2change   | p-value    | Protein                                                  | Function             |
|------------------------|--------------------------------------------------------------------|--------------|------------|----------------------------------------------------------|----------------------|
| <b>Amp vs. Control</b> |                                                                    |              |            |                                                          |                      |
| Up at Amp              | jgi Lobpul1 1061842 gw1.190.25.1                                   | 2.749458677  | 0.020386   | N-acetyltransferase domain-containing protein            | Transcription factor |
| Up at Amp              | jgi Lobpul1 1076300 e_gw1.39.39.1                                  | 31.75542977  | 0.00486    | Cytochrome P450*                                         |                      |
| Up at Control          | jgi Lobpul1 1090852 e_gw1.579.26.1                                 | 3.147069957  | 0.00347    | BTB domain-containing protein                            |                      |
| Down at Control        | jgi Lobpul1 1093319 e_gw1.739.3.1                                  | -1.690034534 | 0.71745948 | Ubiquitin-associated/translation elongation factor EF1B* | ATP binding          |
| Up at Amp              | jgi Lobpul1 1097780 e_gw1.1193.5.1                                 | 1.458953752  | 0.028063   | Putative oxidoreductase*                                 |                      |
| Up at Control          | jgi Lobpul1 1155022 fgenes1_pg.43_#_17                             | 21.50329367  | 0.001637   | FHA domain-containing protein                            |                      |
| Up at Control          | jgi Lobpul1 1157377 fgenes1_pg.153_#_18                            | 9.517571688  | 0.034011   | SnoaL-like domain-containing protein                     | ATP binding          |
| Down at Amp            | jgi Lobpul1 1157586 fgenes1_pg.167_#_13                            | 1.327489679  | 0.047316   | ANK_REP_REGION domain-containing protein                 |                      |
| Up at Amp              | jgi Lobpul1 1163545 fgenes1_pg.745_#_1                             | 3.923271243  | 0.008724   | Actin cytoskeleton-regulatory complex protein PAN2       |                      |
| Up at Amp              | jgi Lobpul1 1188310 fgenes1_kg.129_#_87_#_TRINITY_DN11338_c2_g2_i1 | 3.206864399  | 0.016926   | Dual-specificity kinase *                                | ATP binding          |
| Up at Control          | jgi Lobpul1 1206444 fgenes1_kg.332_#_67_#_TRINITY_DN10794_c2_g2_i2 | 2.281127497  | 0.026888   | GH16 domain-containing protein                           |                      |
| Down at Amp            | jgi Lobpul1 1209203 fgenes1_kg.369_#_23_#_TRINITY_DN9025_c1_g1_i3  | 2.646968337  | 0.039128   | FAD-binding domain-containing protein                    |                      |
| Up at Amp              | jgi Lobpul1 1217968 fgenes1_kg.523_#_9_#_TRINITY_DN10792_c2_g1_i3  |              |            | Stress response protein NST1*                            |                      |

Table S1.

| Down/Up Regulated        | Transcript                                                         | Log2change | p-value  | Protein                                       | Function                                                                                                                                                |
|--------------------------|--------------------------------------------------------------------|------------|----------|-----------------------------------------------|---------------------------------------------------------------------------------------------------------------------------------------------------------|
| Up at Amp                | jgi Lobpul1 1227047 fgenes1_kg.722_#_12_#_TRINITY_DN11384_c6_g2_i1 | 1.851      | 0.042    | MFS domain-containing protein*                | lipid metabolic<br><br>Restored DNA after damage by toxins*<br>stress-activated protein kinase<br>osmotic regulation of transcription of target genes * |
| Down at Amp              | jgi Lobpul1 1246277 fgenes1_pm.46_#_3                              | -1.94      | 0.030    | Delta-12 fatty acid desaturase*               |                                                                                                                                                         |
| Up at Amp                | jgi Lobpul1 1155998 fgenes1_pg.82_#_20                             | 16.99      | 5.34E-05 | ABC multidrug transporter*                    |                                                                                                                                                         |
| Up at Amp                | jgi Lobpul1 204752 CE204695_646                                    | 1.843      | 0.031899 | ATP dependent ligase                          |                                                                                                                                                         |
| Up at Amp                | jgi Lobpul1 1192049 fgenes1_kg.165_#_49_#_TRINITY_DN11041_c0_g1_i1 | 1.62       | 0.047388 | Hog 1*                                        |                                                                                                                                                         |
| Up at Amp                | jgi Lobpul1 1260310 gm1.2384_g                                     | 1.50       | 0.035997 | ABC multidrug transporter*                    |                                                                                                                                                         |
| <b>Cipro vs. Control</b> |                                                                    |            |          |                                               |                                                                                                                                                         |
| Down at Cipro            | jgi Lobpul1 1044813 gw1.792.9.1                                    | 2.306086   | 0.00532  | aspartic-type endopeptidase activity          | Peptide metabolism                                                                                                                                      |
| Up at Control            | jgi Lobpul1 1061842 gw1.190.25.1                                   |            |          | N-acetyltransferase domain-containing protein |                                                                                                                                                         |
| Up at Cipro              | jgi Lobpul1 1076300 e_gw1.39.39.1                                  | 2.170438   | 0.046649 | Cytochrome P452*                              |                                                                                                                                                         |
| Down at Control          | jgi Lobpul1 1090852 e_gw1.579.26.1                                 | -1.402823  | 0.041544 | BTB domain-containing protein                 |                                                                                                                                                         |
| Up at Cipro              | jgi Lobpul1 1097780 e_gw1.1193.5.1                                 | 1.915053   | 0.03479  | Putative oxidoreductase*                      |                                                                                                                                                         |
| Up at Control            | jgi Lobpul1 1155022 fgenes1_pg.43_#_17                             | 4.790436   | 0.016956 | FHA domain-containing protein                 |                                                                                                                                                         |

Table S1. Continued.

| Down/Up Regulated | Transcript                                                         | Log2change | p-value  | Protein                                            | Function                                             |
|-------------------|--------------------------------------------------------------------|------------|----------|----------------------------------------------------|------------------------------------------------------|
| Down at Control   | jgi Lobpul1 1157377 fgenes1_pg.153_#_18                            | -2.69304   | 0.002304 | SnoaL-like domain-containing protein               |                                                      |
| Down at Cipro     | jgi Lobpul1 1157586 fgenes1_pg.167_#_13                            | -2.89306   | 0.014703 | ANK_REP_REGION domain-containing protein           |                                                      |
| Up at Control     | jgi Lobpul1 1163545 fgenes1_pg.745_#_1                             | 2.525057   | 0.015842 | Actin cytoskeleton-regulatory complex protein PAN3 |                                                      |
| Up at Cipro       | jgi Lobpul1 1188310 fgenes1_kg.129_#_87_#_TRINITY_DN11338_c2_g2_i1 | 3.923271   | 0.016589 | Dual-specificity kinase*                           |                                                      |
| Down at Control   | jgi Lobpul1 1206444 fgenes1_kg.332_#_67_#_TRINITY_DN10794_c2_g2_i2 | -1.54401   | 0.00482  | GH16 domain-containing protein                     |                                                      |
| Up at Cipro       | jgi Lobpul1 1217968 fgenes1_kg.523_#_9_#_TRINITY_DN10792_c2_g1_i3  | 9.09567    | 0.001922 | Stress response protein NST2*                      |                                                      |
| Up at Cipro       | jgi Lobpul1 1227047 fgenes1_kg.722_#_12_#_TRINITY_DN11384_c6_g2_i1 | 1.271947   | 0.007961 | MFS domain-containing protein*                     |                                                      |
| Up at Cipro       | jgi Lobpul1 1244062 fgenes1_kg.1575_#_4_#_TRINITY_DN10677_c0_g3_i1 | 4.139624   | 0.001678 | Kp4 domain-containing protein*                     |                                                      |
| Down at Cipro     | jgi Lobpul1 1246277 fgenes1_pm.46_#_3                              | -4.037644  | 0.020267 | Delta-12 fatty acid desaturase                     |                                                      |
| Up at Cipro       | jgi Lobpul1 1073706 e_gw1.8.55.1                                   | 2.354399   | 0.01313  | MFS multidrug transporter*                         | transmembrane transport*                             |
| Up at Cipro       | jgi Lobpul1 257964 CE257907_2099                                   | 6.422108   | 0.029438 | argininosuccinate synthase                         | role in cell division, wound healing *               |
| Up at Cipro       | jgi Lobpul1 304760 CE304703_111                                    | 3.346162   | 0.011549 | DNA repair protein*                                | Repair damage to its DNA from environmental *        |
| Up at Cipro       | jgi Lobpul1 1158526 fgenes1_pg.224_#_11                            | 3.341423   | 0.035894 | efflux pump antibiotic* resistance protein         | removes toxic substances, e.g., antimicrobial agents |

Table S1. Continued.

| Down/Up Regulated      | Transcript                                                         | Log2change | p-value  | Protein                              | Function                              |
|------------------------|--------------------------------------------------------------------|------------|----------|--------------------------------------|---------------------------------------|
| Up at Cipro            | jgi Lobpul1 1090417 e_gw1.555.7.1                                  | 2.022907   | 0.032122 | ABC multidrug transporter*           |                                       |
| Up at Cipro            | jgi Lobpul1 1073706 e_gw1.8.55.1                                   | 1.354598   | 0.015711 | MFS multidrug transporter*           |                                       |
| <b>Mix vs. Control</b> |                                                                    |            |          |                                      |                                       |
| Up at Mix              | jgi Lobpul1 1089261 e_gw1.487.23.1                                 | 2.146947   | 0.025215 | GMC oxidoreductase*                  |                                       |
| Down at Mix            | jgi Lobpul1 1155998 fgenes1_pg.82_#_20                             | -2.18802   | 0.011165 | Beta-ketoacyl synthase               | Fatty acid biosynthesis               |
| Up at Control          | jgi Lobpul1 1157377 fgenes1_pg.153_#_18                            | 1.721281   | 0.018564 | SnoaL-like domain-containing protein |                                       |
| Up at Mix              | jgi Lobpul1 1193923 fgenes1_kg.186_#_4_#_TRINITY_DN11535_c0_g7_i6  | 3.200919   | 0.021927 | C2H2-type domain-containing protein* | Transcription factor                  |
| Down at Mix            | jgi Lobpul1 1209203 fgenes1_kg.369_#_23_#_TRINITY_DN9025_c1_g1_i3  | -1.86918   | 0.003878 | FAD-binding domain                   |                                       |
| Up at Mix              | jgi Lobpul1 1217968 fgenes1_kg.523_#_9_#_TRINITY_DN10792_c2_g1_i3  | 1.51489    | 0.025099 | Stress response protein NST3*        |                                       |
| Down at Control        | jgi Lobpul1 687803 CE687746_1754                                   | -1.74349   | 0.019767 | Protein kinase domain                |                                       |
| Up at Control          | jgi Lobpul1 913856 CE913799_1780                                   | 3.452694   | 0.00097  | SWI/SNF chromatin-remodeling complex |                                       |
| Up at Control          | jgi Lobpul1 1089261 e_gw1.487.23.1                                 | 3.282688   | 0.031944 | GMC oxidoreductase*                  |                                       |
| Down at Mix            | jgi Lobpul1 1155998 fgenes1_pg.82_#_20                             | -1.65662   | 0.017819 | Beta-ketoacyl synthase               | Fatty acid biosynthesis               |
| Up at Control          | jgi Lobpul1 1157377 fgenes1_pg.153_#_18                            | 2.754345   | 0.002395 | SnoaL-like domain                    |                                       |
| Up at Mix              | jgi Lobpul1 1193923 fgenes1_kg.186_#_4_#_TRINITY_DN11535_c0_g7_i6  | 2.028076   | 0.006257 | C2H2-type domain*                    | Transcription factor                  |
| Down at Mix            | jgi Lobpul1 1209203 fgenes1_kg.369_#_23_#_TRINITY_DN9025_c1_g1_i3  | -1.55105   | 0.006034 | FAD-binding domain                   |                                       |
| Up at Mix              | jgi Lobpul1 1219487 fgenes1_kg.551_#_21_#_TRINITY_DN11544_c5_g9_i1 | 1.779607   | 0.003042 | efflux pump antibiotic*              |                                       |
| Up at Mix              | jgi Lobpul1 1163408 fgenes1_pg.723_#_2                             | 1.542306   | 0.028294 | polyketide synthase*                 | antimicrobial and immunosuppressive * |

Table S2. Differential expression genes in the mycobiont of *L. pulmonaria*. The analysis used pairwise comparisons between samples treated with high temperature (25 °C) and low temperature (4 °C). As threshold values, a log2-fold change >1.5 and Benjamini–Hochberg adjusted p-value <0.05 were used. Genes were identified according to the *L. pulmonaria* genome (JGI) and their function according to the fungi genome database at Uniprot.

| Down/Up<br>Regulated | Transcript                                         | Log2change  | p-value  | Protein                                  | Function                          |
|----------------------|----------------------------------------------------|-------------|----------|------------------------------------------|-----------------------------------|
| 25 °C vs. 4 °C       |                                                    |             |          |                                          |                                   |
| Down at 25           | jgi Lobpul1 1045812 gw1.238.4.1                    | -1.59968    | 0.034417 | ANK_REP_REGION domain-containing protein |                                   |
| Up at 25             | jgi Lobpul1 1051947 gw1.387.10.1                   | 1.240632339 | 0.025148 | HET domain-containing protein            |                                   |
| Down at 4            | jgi Lobpul1 1060469 gw1.374.11.1                   | -1.56265    | 0.042805 | HET domain-containing protein            |                                   |
| Up at 25             | jgi Lobpul1 1075956 e_gw1.33.82.1                  | 1.5105086   | 0.012035 | protein kinase                           | transfer phosphate, ATP           |
| Up at 25             | jgi Lobpul1 1081549 e_gw1.177.43.1                 | 3.48046219  | 0.029996 | MAP kinase SskB*                         | Response to heat, osmotic stress* |
| Down at 25           | jgi Lobpul1 1078849 e_gw1.96.23.1                  | -1.88187    | 0.019992 | TPR_REGION domain-containing protein     |                                   |
| Down at 4            | jgi Lobpul1 1099469 e_gw1.1509.2.1                 | -2.17442    | 0.031321 | PNP_UDP_1 domain-containing protein      |                                   |
| Down at 4            | jgi Lobpul1 1100190 estExt_Genewise1Plus.C_10004   | -1.60657    | 0.005508 | Putative GNAT acetyltransferase          |                                   |
| Down at 25           | jgi Lobpul1 1110751 estExt_Genewise1Plus.C_3310026 | -1.85978    | 0.001057 | DUF676 domain-containing protein         |                                   |
| Up at 4              | jgi Lobpul1 1138430 estExt_Genewise1.C_5690016     | 1.71        | 0.046    | ANK_REP_REGION domain-containing protein |                                   |
| Down at 25           | jgi Lobpul1 1156388 fgenes1_pg.101_#_14            | -1.70287    | 0.006287 | ANK_REP_REGION domain-containing protein |                                   |
| Down at 4            | jgi Lobpul1 1157602 fgenes1_pg.168_#_15            | -2.57941    | 0.014264 | Kinesin motor domain-containing protein  |                                   |
| Down at 4            | jgi Lobpul1 1159332 fgenes1_pg.281_#_4             | -1.5087     | 0.021952 | Urea active transporter                  |                                   |
| Down at 4            | jgi Lobpul1 1160352 fgenes1_pg.365_#_6             | -1.59123    | 0.049    | ANK_REP_REGION domain-containing protein |                                   |

Table S2. Continued

| Down/Up Regulated | Transcript                                                           | Log2change | p-value | Protein                                         | Function                                                               |
|-------------------|----------------------------------------------------------------------|------------|---------|-------------------------------------------------|------------------------------------------------------------------------|
| Up at 25          | jgi Lobpul1 1161527 fgenes1_pg.478_#_11                              | 1.69       | 0.0327  | HET domain-protein                              |                                                                        |
| Up at 4           | jgi Lobpul1 1220557 fgenes1_kg.572_#_25_#_TRINITY_DN10504_c0_g1_i1   | 1.024      | 0.0338  | Chitin-binding type-1 domain-containing protein |                                                                        |
| Down at 25        | jgi Lobpul1 1259647 gm1.1721_g                                       | -2.21      | 0.0470  | Glycosyl hydrolase                              |                                                                        |
| Up at 25          | jgi Lobpul1 1175972 fgenes1_kg.39_#_49_#_TRINITY_DN9593_c1_g2_i2     | 1.70       | 0.0164  | 3-hydroxyisobutyrate dehydrogenase              | Reduction NAP to NAPH                                                  |
| Up at 25          | jgi Lobpul1 1186473 fgenes1_kg.114_#_164_#_TRINITY_DN11600_c3_g12_i1 | 1.27       | 0.0049  | branched-chain amino acid aminotransferase      | Catalysis biochemical rx physiological temperatures                    |
| Up at 25          | jgi Lobpul1 1259869 gm1.1943_g                                       | 1.73       | 0.0098  | branched-chain amino acid aminotransferase      | Catalysis biochemical rx physiological temperatures                    |
| Up at 25          | jgi Lobpul1 1266787 gm1.8861_g                                       | 1.47       | 0.0376  | disulfide isomerase*                            | maintains the redox environment of a cell exposes to stress *          |
| Up at 25          | jgi Lobpul1 1269925 gm1.11999_g                                      | 5.84       | 0.0090  | cytochrome P450*                                | Catalysis of an oxidation-reduction (redox) reaction                   |
| Up at 25          | jgi Lobpul1 555700 CE555643_29333                                    | 3.31       | 0.0159  | MFS lactose permease*                           | Transmembrane transport                                                |
| Up at 4           | jgi Lobpul1 756045 CE755988_2676                                     | 1.93       | 0.0212  | allantoate permease*                            | Transmembrane transport                                                |
| Down at 4         | jgi Lobpul1 102832 CE102775_1579                                     | -1.57      | 0.0462  | WetA developmental regulatory protein           | producing non-motile spores, via mitotic asexual reproduction in fungi |
| Down at 15        | jgi Lobpul1 1038709 gw1.7.2.1                                        | -2.00      | 0.0058  | NRPS-like enzyme*                               | Carbohydrate metabolic process*                                        |
| Down at 4         | jgi Lobpul1 1080098 e_gw1.129.23.1                                   | -2.13      | 0.0107  | dimethylaniline monooxygenase                   | Chemical rx and pathways by which a cell derives energy                |
| Down at 25        | jgi Lobpul1 1095268 e_gw1.899.8.1                                    | -2.28      | 0.0411  | palmitoyltransferase                            | Metabolism lipids                                                      |
| Down at 25        | jgi Lobpul1 1217558 fgenes1_kg.514_#_61_#_TRINITY_DN11473_c1_g13_i1  | -1.72      | 0.0163  | zinc finger protein DHHC                        | Metabolism lipids                                                      |

Table S2. Continued.

| Down/Up Regulated | Transcript                        | Log2change  | <i>p</i> -value | Protein                                       | Function                                             |
|-------------------|-----------------------------------|-------------|-----------------|-----------------------------------------------|------------------------------------------------------|
| Down at 25        | jgi Lobpul1 220108 CE220051_1898  | -2.35513    | 0.011142        | karyopherin alpha subunit                     | Regulatory stages of asexual and sexual development. |
| Up at 4           | jgi Lobpul1 1261443 gm1.3517_g    | 1.534850276 | 0.017929        | N-acetyltransferase protein                   |                                                      |
| Down at 4         | jgi Lobpul1 1266617 gm1.8691_g    | -2.42777    | 0.000547        | Helo_like_N protein                           |                                                      |
| Up at 4           | jgi Lobpul1 1270058 gm1.12132_g   | 1.909721863 | 0.01073         | Magnesium transport protein CorA,             | Transmembrane transport                              |
| Up at 4           | jgi Lobpul1 1270289 gm1.12363_g   | 0.592657098 | 0.040187        | Protein kinase domain-containing protein      |                                                      |
| Down at 4         | jgi Lobpul1 1272499 gm1.14573_g   | -2.02266    | 0.04457         | SMP domain-containing protein                 |                                                      |
| Down at 25        | jgi Lobpul1 179989 CE179932_381   | -1.86166    | 0.025703        | ANK_REP_REGION domain-containing protein      |                                                      |
| Down at 25        | jgi Lobpul1 309425 CE309368_466   | -2.23643    | 0.038242        | ANK_REP_REGION domain-containing protein      |                                                      |
| Up at 4           | jgi Lobpul1 560648 CE560591_49629 | 3.60        | 0.032257        | F-box domain-containing protein               |                                                      |
| Down at 4         | jgi Lobpul1 894361 CE894304_2031  | -1.71603    | 0.016341        | Vacuolar-protein-sorting/targeting protein 10 | Protein transport                                    |



Table S3. Selected GO term results from functional enrichment analyses of genes within WGCNA module eigengenes mycobiont.

| Transcript                                                 | Go ID | Go Name                                                                   | Go category        | goAcc      |
|------------------------------------------------------------|-------|---------------------------------------------------------------------------|--------------------|------------|
| Grey Antibiotic<br>Temperature R <sup>2</sup> = -0.25      |       |                                                                           |                    |            |
| 479713                                                     | 16    | mitochondrial genome maintenance                                          | biological_process | GO:0000002 |
| 479713                                                     | 257   | mitochondrial chromosome                                                  | cellular_component | GO:0000262 |
| 1165599                                                    | 23919 | FAD binding                                                               | molecular_function | GO:0050660 |
| 1165599                                                    | 2290  | catalytic activity                                                        | molecular_function | GO:0003824 |
| 1241701                                                    | 2888  | monooxygenase activity                                                    | molecular_function | GO:0004497 |
| 1241701                                                    | 10964 | salicylate 1-monooxygenase activity                                       | molecular_function | GO:0018658 |
| 1241701                                                    | 4851  | aromatic compound metabolic process                                       | biological_process | GO:0006725 |
| 1241701                                                    | 5830  | metabolic process                                                         | biological_process | GO:0008152 |
| 1241701                                                    | 4283  | electron transport                                                        | biological_process | GO:0006118 |
| 1268438                                                    | 3200  | ubiquitin-protein ligase activity                                         | molecular_function | GO:0004842 |
| 1268438                                                    | 24691 | negative regulation of ubiquitin-protein ligase activity                  | biological_process | GO:0051444 |
| 1268438                                                    | 24685 | regulation of ubiquitin-protein ligase activity                           | biological_process | GO:0051438 |
| 1268438                                                    | 5939  | zinc ion binding                                                          | molecular_function | GO:0008270 |
| 1268438                                                    | 24687 | regulation of ubiquitin-protein ligase activity during meiotic cell cycle | biological_process | GO:0051440 |
| 1268438                                                    | 24690 | positive regulation of ubiquitin-protein ligase activity                  | biological_process | GO:0051443 |
| 1326401                                                    | 5830  | metabolic process                                                         | biological_process | GO:0008152 |
| 1326401                                                    | 9710  | oxidoreductase activity                                                   | molecular_function | GO:0016491 |
| Yellow Antibiotic<br>Treatment R <sup>2</sup> = -0.23      |       |                                                                           |                    |            |
| 766509                                                     | 4143  | carbohydrate metabolic process                                            | biological_process | GO:0005975 |
| 766509                                                     | 10063 | intramolecular transferase activity, phosphotransferases                  | molecular_function | GO:0016868 |
| 766509                                                     | 2984  | phosphoacetylglucosamine mutase activity                                  | molecular_function | GO:0004610 |
| Turquoise<br>Antibiotic treatment<br>R <sup>2</sup> = 0.59 |       |                                                                           |                    |            |
| 1263640                                                    | 9320  | membrane                                                                  | cellular_component | GO:0016020 |
| 1263640                                                    | 8535  | amino acid transmembrane transporter activity                             | molecular_function | GO:0015171 |
| 1263640                                                    | 4977  | amino acid transport                                                      | biological_process | GO:0006865 |

Table S4. Differential expression genes in *Symbiochloris reticulata*, the green-algal photobiont of the lichen *L. pulmonaria*. The analysis used pairwise comparisons between samples not treated with Antibiotic (Control), and treated with Antibiotic: Ampicillin (Amp), Ciprofloxacin (Cipro) and Mix, with a log2-fold change >1.5 and Benjamini–Hochberg adjusted p-value <0.05. Genes were identified according to the *S. reticulata* genome annotation from JGI and their function was derived by homology to the plant genome database at Uniprot.

| Down/Up regulated      | Transcript | Log2change | p-value  | Protein                                                                | Function           |
|------------------------|------------|------------|----------|------------------------------------------------------------------------|--------------------|
| <b>Amp vs. Control</b> |            |            |          |                                                                        |                    |
| Down at Amp            | 584        | -2.238     | 0.010543 | SET domain-containing protein                                          | methylation        |
| Up at Control          | 896        | 3.219838   | 0.006884 | WD_REPEATS_REGION domain-containing protein                            |                    |
| Down at Control        | 1014       | -2.24666   | 0.001694 | MYB transcription factor*                                              | DNA binding        |
| Down at Amp            | 1210       | -2.12971   | 0.019874 | Squalene synthase                                                      | Lipid biosynthesis |
| Up at Control          | 1253       | 1.951078   | 0.002494 | Lysophosphatidic acid phosphatase type 6                               |                    |
| Up at Amp              | 1383       | 2.264727   | 0.021287 | Cytochrome P450*                                                       |                    |
| Down at Amp            | 2708       | -1.72581   | 0.466834 | Putative extracellular protein CSOL_018                                | methylation        |
| Down at Control        | 2713       | -2.80654   | 0.106592 | Argininosuccinate lyase                                                |                    |
| Down at Amp            | 584        | -2.04006   | 0.75147  | SET domain-containing protein                                          | DNA binding        |
| Up at Amp              | 3066       | 3.115507   | 0.036508 | CLP1_P domain-containing protein*                                      | ATP binding        |
| Down at Control        | 3807       | -3.06058   | 0.624937 | Reverse transcriptase                                                  |                    |
| Down at Control        | 4243       | -1.77964   | 0.751218 | Amidase signature enzyme                                               |                    |
| Up at Amp              | 4362       | 1.697388   | 0.049864 | Glyoxalase/Bleomycin resistance protein/Dihydroxybiphenyl dioxygenase* | Redox              |
| Up at control          | 4901       | 1.755686   | 0.015267 | EGF-like domain-containing protein                                     |                    |
| Down at Control        | 5584       | -2.5541    | 0.026253 | Glycosyltransferase family 92 protein                                  |                    |

Table S4. Continued.

| Down/Up regulated | Transcript | Log2change | p-value  | Protein                                                 | Function                  |
|-------------------|------------|------------|----------|---------------------------------------------------------|---------------------------|
| Up at Amp         | 6345       | 2.20       | 0.0438   | Agenet-like domain-containing protein*                  | transcription initiation  |
| Down at Amp       | 6378       | -3.17671   | 0.036915 | DAD1                                                    |                           |
| Down at Control   | 6449       | -1.97421   | 0.032417 | Flavin-containing monooxygenase*                        | NAP binding               |
| Up at Control     | 7285       | 1.826572   | 0.002198 | Plasma membrane ATPase                                  |                           |
| Down at Control   | 7526       | -1.8       | 0.027    | Gamma-tubulin complex component 2                       |                           |
| Up at Control     | 7654       | 2.776076   | 0.024696 | Protein serine/threonine phosphatase 2C                 |                           |
| Up at Control     | 7754       | 1.973538   | 0.025413 | Serine threonine-kinase SRK2E-like                      |                           |
| Down at Amp       | 7759       | -1.78739   | 0.01834  | Methyl-accepting transducer domain-containing protein   |                           |
| Up at Amp         | 7602       | 2.662416   | 0.047813 | FAD-binding PCMH-type protein*                          | oxidoreductase activity   |
| Up at Amp         | 9239       | 1.74894    | 0.047767 | Small-conductance mechanosensitive ion channel family * |                           |
| Down at Amp       | 9256       | -1.64939   | 0.027314 | Small ubiquitin-related modifier                        |                           |
| Up at Control     | 9472       | 2.172812   | 0.042341 | USP domain-containing protein                           |                           |
| Up at Control     | 9639       | 3.443647   | 0.004403 | Non-specific serine/threonine kinase                    |                           |
| Down at Control   | 9686       | -2.95122   | 0.027403 | Dihydrodipicolinate reductase chloroplastic-like        |                           |
| Up at Amp         | 9958       | 1.671791   | 0.023621 | E3 ubiquitin protein ligase                             | protein modification      |
| Up at Amp         | 10081      | 1.711246   | 0.020326 | Exostosin-like glycosyltransferase                      |                           |
| Up at Control     | 10408      | 1.716358   | 0.005034 | WD40 repeat-like protein                                |                           |
| Up at Amp         | 10748      | 1.804726   | 0.0132   | Hexosyltransferase                                      | protein glycosylation     |
| Up at Amp         | 11397      | 2.672953   | 0.035013 | MFS domain-containing protein*                          | transmembrane transporter |

Table S4. Continued.

| <b>Down/Up regulated</b> | <b>Transcript</b> | <b>Log2change</b> | <b>p-value</b> | <b>Protein</b>                                                                                      | <b>Function</b>         |
|--------------------------|-------------------|-------------------|----------------|-----------------------------------------------------------------------------------------------------|-------------------------|
| Down at Amp              | 11146             | -2.57616          | 0.027855       | Methyltransferase sll0829                                                                           |                         |
| Up at Control            | 11256             | 3.162374          | 0.021374       | SMP-LTD domain-containing protein                                                                   | lipid transport         |
| Up at Amp                | 11345             | 2.244906          | 0.01327        | PseudoU_synth_2 domain-containing                                                                   | RNA biding              |
| Up at Amp                | 11607             | 2.050505          | 0.011149       | MFS domain-containing protein*                                                                      |                         |
| Up at Control            | 12711             | 2.944593          | 0.022457       | Gluconokinase                                                                                       |                         |
| <b>Cipro vs. Control</b> |                   |                   |                |                                                                                                     |                         |
| Up at Control            | 152               | 1.89              | 0.04013        | S5 DRBM domain-containing protein                                                                   | translation             |
| Down at Cipro            | 949               | -2.55878          | 0.002652       | Cellulase domain-containing protein                                                                 | Carbohydrate metabolism |
| Down at Control          | 3203              | -2.0367           | 0.034769       | Sucrose-phosphatase                                                                                 |                         |
| Down at Control          | 3725              | -3.41731          | 0.002289       | BED-type domain-containing protein                                                                  | DNA biding              |
| Down at Cipro            | 3756              | -1.71059          | 0.04335        | protein folding                                                                                     |                         |
| Down at Cipro            | 5736              |                   |                | 1-(5-phosphoribosyl)-5-[(5-phosphoribosylamino) methylideneamino] imidazole-4-carboxamide isomerase | Chloroplastic protein   |
|                          |                   | -1.63378          | 0.040053       |                                                                                                     |                         |
| Up at Control            | 6352              | 2.28235           | 0.020451       | Enkurin domain-containing protein                                                                   |                         |
| Down at Control          | 6838              | -2.41059          | 0.012036       | Thioredoxin-dependent peroxiredoxin                                                                 |                         |
| Down at Cipro            | 6961              | -2.77236          | 0.011312       | DnaJ-domain-containing protein                                                                      |                         |

Table S4. Continued.

| <b>Down/Up regulated</b> | <b>Transcript</b> | <b>Log2change</b> | <b>p-value</b> | <b>Protein</b>                        | <b>Function</b>         |
|--------------------------|-------------------|-------------------|----------------|---------------------------------------|-------------------------|
| Up at Cipro              | 8777              | 2.470173          | 0.011974       | Transcription factor jumonji*         |                         |
| Up at Control            | 10184             | 1.519255          | 0.001983       | DUF221-domain-containing protein      |                         |
| Up Cipro                 | 10661             | 1.74786           | 0.004925       | Armadillo repeat-containing protein 8 |                         |
| <b>Mix vs. Control</b>   |                   |                   |                |                                       |                         |
| Down at Control          | 268               | -3.19103          | 0.047718       | Replication factor C subunit 3-like   | DNA replication         |
| Down at Control          | 297               | -2.15942          | 0.007133       | Rieske domain-containing protein      | Nitrate assimilation    |
| Up at Mix                | 1481              | 1.853307          | 0.02733        | Sulfur stress regulator*              | protein kinase activity |
| Down at Control          | 2024              | -1.91354          | 0.048908       | L-amino-acid oxidase*                 |                         |
| Down at Mix              | 2518              | -2.59486          | 0.009147       | Ceramide glucosyltransferase          |                         |
| Up at Control            | 2631              | 1.095385          | 0.030214       | Xylose isomerase protein              |                         |
| Up at Mix                | 2954              | 1.925634          | 0.044702       | FAD-binding PCMH-type protein*        | oxidoreductase activity |
| Down at Mix              | 3703              | -1.53576          | 0.024386       | Prefoldin beta-like protein           |                         |
| Up at Control            | 4424              | 2.323134          | 0.00409        | NDC10_II domain-containing protein    |                         |
| Up at Mix                | 4739              | 2.556206          | 0.035811       | J domain-containing protein           |                         |
| Up at Mix                | 5241              | 3.005322          | 0.042539       | LNS2 domain-containing protein        |                         |
| Up at Control            | 5362              | 3.217045          | 0.036963       | Protein kinase domain protein         |                         |
| Down at Control          | 5548              | -1.53321          | 0.012768       | Lactamase_B domain-containing protein |                         |
| Up at Mix                | 5578              | 1.587247          | 0.046877       | N-terminal nucleophile aminohydrolase |                         |

Table S4. Continued.

| <b>Down/Up regulated</b> | <b>Transcript</b> | <b>Log2change</b> | <b>p-value</b> | <b>Protein</b>                                                           | <b>Function</b>      |
|--------------------------|-------------------|-------------------|----------------|--------------------------------------------------------------------------|----------------------|
| Up Control               | 6201              | 1.51826           | 0.044273       | PPM-type phosphatase protein                                             |                      |
| Down at Mix              | 6409              | -1.76804          | 0.035106       | Flavin-containing monooxygenase                                          |                      |
| Up at Control            | 6733              | 5.487569          | 0.005174       | STAS domain-containing protein                                           |                      |
| Up at Mix                | 6775              | 3.430975          | 0.013289       | tRNA-uridine amino carboxy propyl transferase                            |                      |
| Up at Mix                | 7142              | 5.422218          | 0.000224       | Na_H_Exchanger domain protein                                            |                      |
| Up at Mix                | 8293              | 3.254776          | 0.021797       | Sulfurtransferase                                                        |                      |
| Down at Control          | 9282              | -2.66395          | 0.004784       | Aa_trans domain-containing protein                                       |                      |
| Up at Mix                | 9949              | 3.254776          | 0.021797       | Kinase-like protein                                                      |                      |
| Up at Mix                | 1383              | 4.706881          | 0.016497       | Adenine guanine permease AZG1*                                           | Membrane transporter |
| Down at Mix              | 10838             | -1.93365          | 0.004042       | TPT domain-containing protein                                            |                      |
| Down at Control          | 11657             | -2.6786           | 0.042358       | Variable flagella 1                                                      |                      |
| Down at Control          | 12347             | -2.81526          | 0.011933       | MFS general substrate transporter*                                       |                      |
| Down at Mix              | 11992             | -3.03748          | 0.031075       | Succinate dehydrogenase                                                  |                      |
| Up at Control            | 12377             | 3.298754          | 0.025245       | Nucleolar 14-like                                                        | ribosome biogenesis  |
| Down at Control          | 12347             | -1.56166          | 0.002856       | Hyperpolarization activated cyclicnucleotide-gated potassium channel 4 * |                      |

Table S5. Differential expression genes in *Symbiochloris reticulata*, the green-algal photobiont of the lichen *L. pulmonaria*. The analysis used pairwise comparisons between samples treated with high temperature (25 °C) and low temperature (4 °C), with a log2-fold change >1.5 and Benjamini–Hochberg adjusted p-value <0.05. Genes were identified according to the *S. reticulata* genome annotation from JGI and their function was derived by homology to the plant genome database at Uniprot.

| <b>Down/Up regulated</b> | <b>Transcript</b> | <b>Log2change</b> | <b>p-value</b> | <b>Protein</b>                          | <b>Function</b> |
|--------------------------|-------------------|-------------------|----------------|-----------------------------------------|-----------------|
| Down at 4                | 508               | -2.14             | 0.034          | Alpha beta hydrolase                    |                 |
| Down at 25               | 3173              | -1.98             | 0.039          | TPT-domain-containing protein           |                 |
| Down at 25               | 3711              | -2.31             | 0.023          | Nicotinate phosphoribosyltransferase    |                 |
| Up at 4                  | 5893              | 2.34              | 0.026          | N-terminal nucleophile aminohydrolase   |                 |
| Down at 25               | 7371              | -1.58             | 0.030          | CBFD_NFYB_HMF domain-containing protein |                 |
| Down at 4                | 7864              | -3.10             | 0.020          | 5'-deoxynucleotidase                    |                 |
| Up at 25                 | 7906              | 2.76              | 0.032          | DNA ligase                              |                 |
| Up at 25                 | 10900             | 1.73              | 0.028          | Cytochrome P450                         |                 |

Table S6. Select GO term results from functional enrichment analyses of genes within WGCNA module eigengenes photobiont.

| Transcript                                           | Go ID | Go Name                                                 | Go category        | goAcc      |
|------------------------------------------------------|-------|---------------------------------------------------------|--------------------|------------|
| Turquoise Antibiotic treatment R <sup>2</sup> = 0.22 |       |                                                         |                    |            |
| 1707                                                 | 10013 | hydrolase activity                                      | molecular_function | GO:0016818 |
| 1707                                                 | 3736  | ATP binding                                             | molecular_function | GO:0005524 |
| 3391                                                 | 4602  | protein amino acid phosphorylation                      | biological_process | GO:0006468 |
| 3391                                                 | 3736  | ATP binding                                             | molecular_function | GO:0005524 |
| 3391                                                 | 3043  | protein kinase activity                                 | molecular_function | GO:0004672 |
| 3997                                                 | 111   | imidazoleglycerol-phosphate synthase activity           | molecular_function | GO:0000107 |
| 3997                                                 | 10461 | NAD(P)-asparagine ADP-ribosyltransferase activity       | molecular_function | GO:0018121 |
| 3997                                                 | 10467 | NAD(P)-serine ADP-ribosyltransferase activity           | molecular_function | GO:0018127 |
| 3997                                                 | 19331 | 7-cyano-7-deazaguanine tRNA-ribosyltransferase activity | molecular_function | GO:0043867 |
| 3997                                                 | 10420 | NAD(P)-cysteine ADP-ribosyltransferase activity         | molecular_function | GO:0018071 |
| 8744                                                 | 10269 | nucleoside-triphosphatase activity                      | molecular_function | GO:0017111 |
| 8744                                                 | 2176  | DNA binding                                             | molecular_function | GO:0003677 |
| 8744                                                 | 3838  | nucleus                                                 | cellular_component | GO:0005634 |
| 8744                                                 | 3736  | ATP binding                                             | molecular_function | GO:0005524 |
| 8744                                                 | 162   | nucleotide binding                                      | molecular_function | GO:0000166 |
| 8744                                                 | 3862  | DNA replication factor C complex                        | cellular_component | GO:0005663 |
| 8744                                                 | 4421  | DNA replication                                         | biological_process | GO:0006260 |
| 11957                                                | 5939  | zinc ion binding                                        | molecular_function | GO:0008270 |
| 11957                                                | 3727  | protein binding                                         | molecular_function | GO:0005515 |
| 8744                                                 | 10269 | nucleoside-triphosphatase activity                      | molecular_function | GO:0017111 |
